# Supplementary material
Source: publisher site journal article supplement (https://www.dovepress.com/article/344972)
Supplement: Supplementary file 1 [file get_supplementary_file.php]

Accounting System: 2024-2025

| Account No. | Account Name        | Balance | Debit | Credit |
|-------------|---------------------|---------|-------|--------|
| 101         | Cash                | 100.00  |       |        |
| 102         | Accounts Receivable | 200.00  |       |        |
| 103         | Inventory           | 150.00  |       |        |
| 104         | Accounts Payable    | 50.00   |       |        |
| 201         | Retained Earnings   | 500.00  |       |        |
| 202         | Common Stock        | 500.00  |       |        |
| 301         | Accounts Receivable | 200.00  |       |        |
| 302         | Inventory           | 150.00  |       |        |
| 303         | Accounts Payable    | 50.00   |       |        |
| 304         | Retained Earnings   | 500.00  |       |        |
| 305         | Common Stock        | 500.00  |       |        |
| 401         | Accounts Receivable | 200.00  |       |        |
| 402         | Inventory           | 150.00  |       |        |
| 403         | Accounts Payable    | 50.00   |       |        |
| 404         | Retained Earnings   | 500.00  |       |        |
| 405         | Common Stock        | 500.00  |       |        |
| 501         | Accounts Receivable | 200.00  |       |        |
| 502         | Inventory           | 150.00  |       |        |
| 503         | Accounts Payable    | 50.00   |       |        |
| 504         | Retained Earnings   | 500.00  |       |        |
| 505         | Common Stock        | 500.00  |       |        |

Accounting System: 2024-2025

| Account No. | Account Name        | Balance | Debit | Credit |
|-------------|---------------------|---------|-------|--------|
| 101         | Cash                | 100.00  |       |        |
| 102         | Accounts Receivable | 200.00  |       |        |
| 103         | Inventory           | 150.00  |       |        |
| 104         | Accounts Payable    | 50.00   |       |        |
| 201         | Retained Earnings   | 500.00  |       |        |
| 202         | Common Stock        | 500.00  |       |        |
| 301         | Accounts Receivable | 200.00  |       |        |
| 302         | Inventory           | 150.00  |       |        |
| 303         | Accounts Payable    | 50.00   |       |        |
| 304         | Retained Earnings   | 500.00  |       |        |
| 305         | Common Stock        | 500.00  |       |        |
| 401         | Accounts Receivable | 200.00  |       |        |
| 402         | Inventory           | 150.00  |       |        |
| 403         | Accounts Payable    | 50.00   |       |        |
| 404         | Retained Earnings   | 500.00  |       |        |
| 405         | Common Stock        | 500.00  |       |        |
| 501         | Accounts Receivable | 200.00  |       |        |
| 502         | Inventory           | 150.00  |       |        |
| 503         | Accounts Payable    | 50.00   |       |        |
| 504         | Retained Earnings   | 500.00  |       |        |
| 505         | Common Stock        | 500.00  |       |        |
| 601         | Accounts Receivable | 200.00  |       |        |
| 602         | Inventory           | 150.00  |       |        |
| 603         | Accounts Payable    | 50.00   |       |        |
| 604         | Retained Earnings   | 500.00  |       |        |
| 605         | Common Stock        | 500.00  |       |        |
| 701         | Accounts Receivable | 200.00  |       |        |
| 702         | Inventory           | 150.00  |       |        |
| 703         | Accounts Payable    | 50.00   |       |        |
| 704         | Retained Earnings   | 500.00  |       |        |
| 705         | Common Stock        | 500.00  |       |        |
| 801         | Accounts Receivable | 200.00  |       |        |
| 802         | Inventory           | 150.00  |       |        |
| 803         | Accounts Payable    | 50.00   |       |        |
| 804         | Retained Earnings   | 500.00  |       |        |
| 805         | Common Stock        | 500.00  |       |        |
| 901         | Accounts Receivable | 200.00  |       |        |
| 902         | Inventory           | 150.00  |       |        |
| 903         | Accounts Payable    | 50.00   |       |        |
| 904         | Retained Earnings   | 500.00  |       |        |
| 905         | Common Stock        | 500.00  |       |        |
| 906         | Accounts Receivable | 200.00  |       |        |
| 907         | Inventory           | 150.00  |       |        |
| 908         | Accounts Payable    | 50.00   |       |        |
| 909         | Retained Earnings   | 500.00  |       |        |
| 910         | Common Stock        | 500.00  |       |        |
| 911         | Accounts Receivable | 200.00  |       |        |
| 912         | Inventory           | 150.00  |       |        |
| 913         | Accounts Payable    | 50.00   |       |        |
| 914         | Retained Earnings   | 500.00  |       |        |
| 915         | Common Stock        | 500.00  |       |        |
